# Supplementary material
Source: MDPI journal article supplement (https://www.mdpi.com/2079-6412/14/4/515)
Supplement: s1 [file s1]

Supplementary Materials

# **Nitrogen-Doped Diamond-Like Carbon Buffer Layer Enhances the Mechanical and Tribological Properties of Diamond-Like Carbon Films Deposited on Nitrile Rubber Substrate**

**Yinqiao Song<sup>1</sup>, Changxin Han<sup>1</sup>, Nini Zhen<sup>1</sup>, Yukai Wang<sup>1</sup>, Yongxiang Leng<sup>2</sup>, Zhiyu Wu<sup>3</sup>, Qiaoyuan Deng<sup>1,\*</sup> and Feng Wen<sup>1,\*</sup>**

<sup>1</sup> Special Glass Key Laboratory of Hainan Province, School of Materials Science and Engineering, Hainan University, Haikou 570228, China; yqsong0829@163.com (Y.S.); hcx0919@hainanu.edu.cn (C.H.); 14797339669@163.com (N.Z.); 15903525222@163.com (Y.W.)

<sup>2</sup> Key Laboratory of Advanced Technologies of Materials, College of Medicine, Ministry of Education, Southwest Jiaotong University, Chengdu 610031, China; yxleng@home.swjtu.edu.cn

<sup>3</sup> School of Physics and Optoelectronic Engineering, Hainan University, Haikou 570228, China; likewzy@163.com

\* Correspondence: author: qydeng@hainanu.edu.cn (Q.D.); fwen323@hainanu.edu.cn (F.W.)

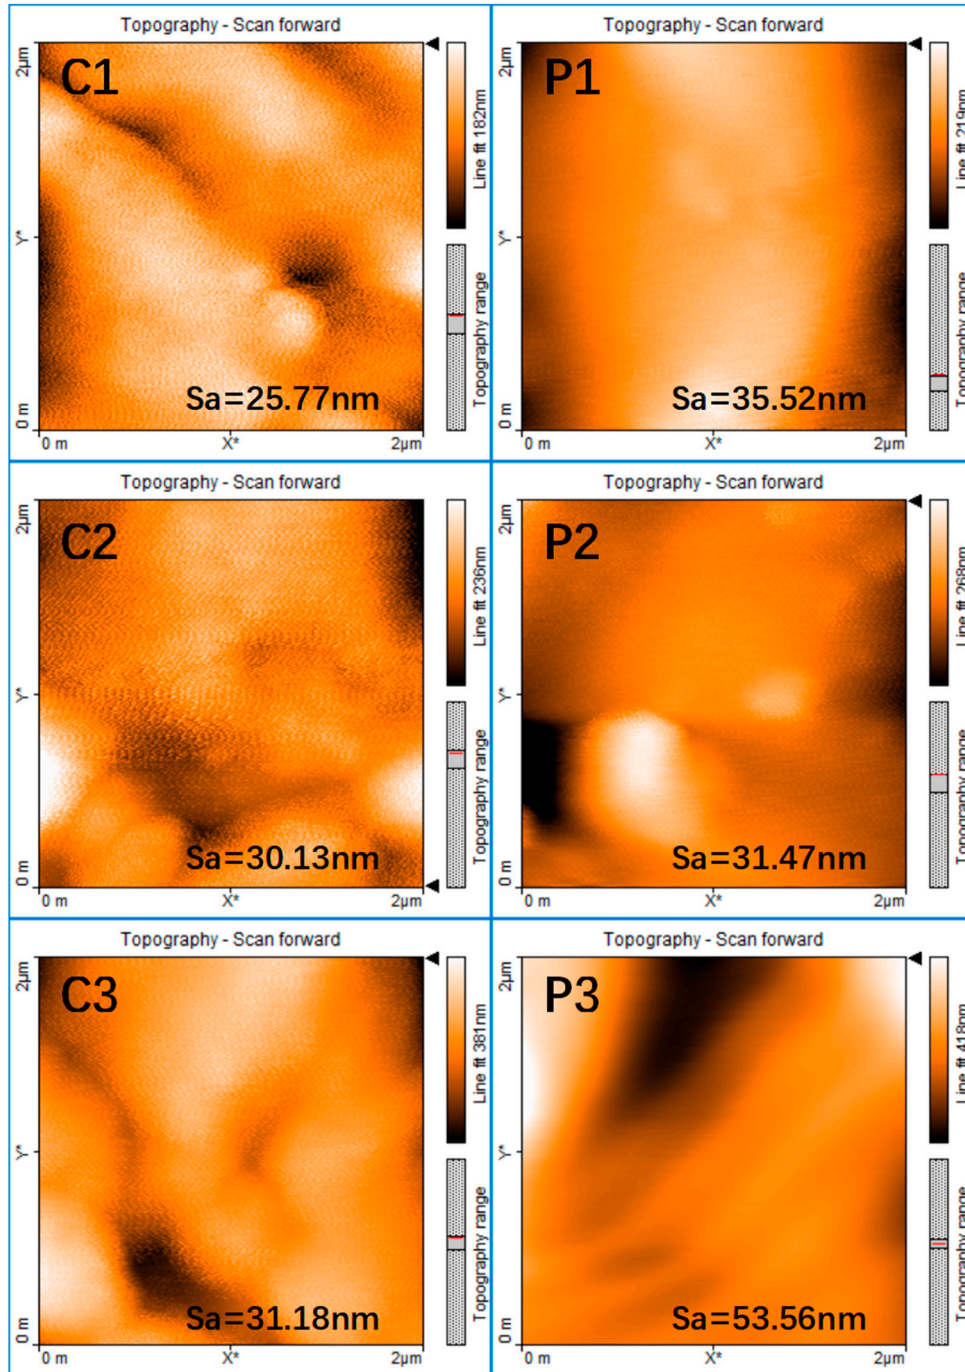

Figure S1: AFM image of the final DLC film with that of both the substrate and N-DLC buffer layer.

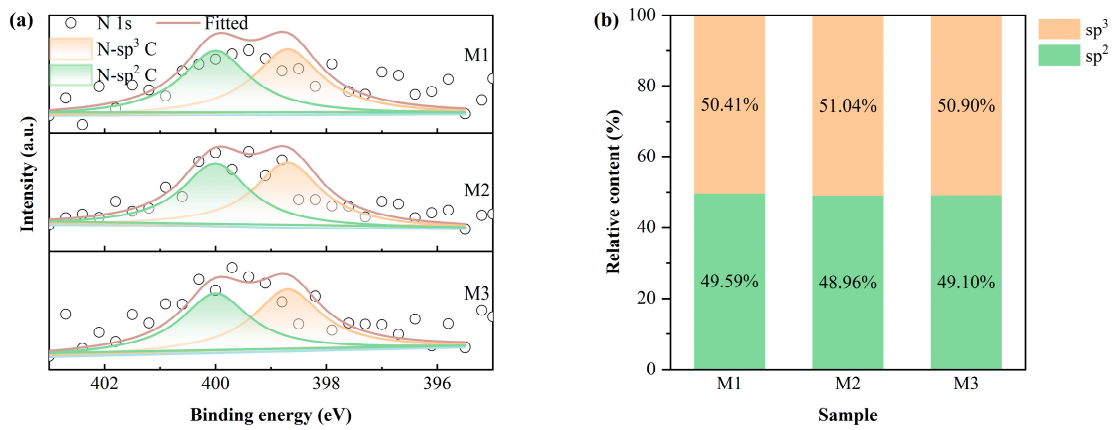

Figure S2: (a) XPS N1s spectra of interlayer film deposited on NBR at different bias voltages; (b) corresponding sp² and sp³ percentages of sp²N-C/sp³N-C

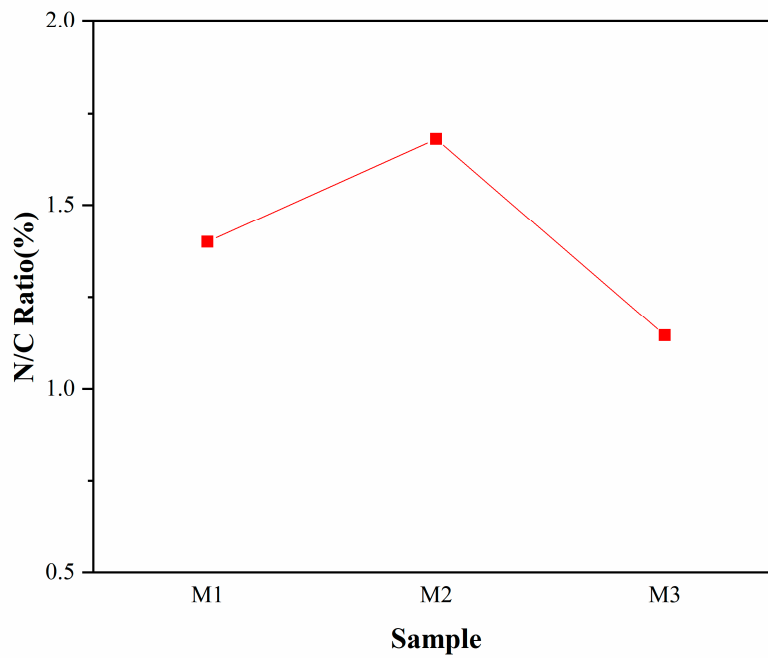

Figure S3: N/C percentage of interlayer films deposited on NBR under different bias voltages.

The N1s spectra of the interlayer films exhibit two characteristic peaks with binding energies of  $398.7 \pm 0.1$  eV and  $399.9 \pm 0.2$  eV, respectively, which are corresponding to sp³N-C and sp²N-C bond, as depicted in Figure S2. The N/C percentage of interlayer film deposited on NBR at different bias voltages is shown in Figure S3. It can be seen the N content is very low in the N-DLC interlayer.
